# Supplementary material
Source: publisher site journal article supplement (https://www.dovepress.com/article/513823)
Supplement: Supplementary file 1 [file 513823+Revised+Supplementary+Material.docx]

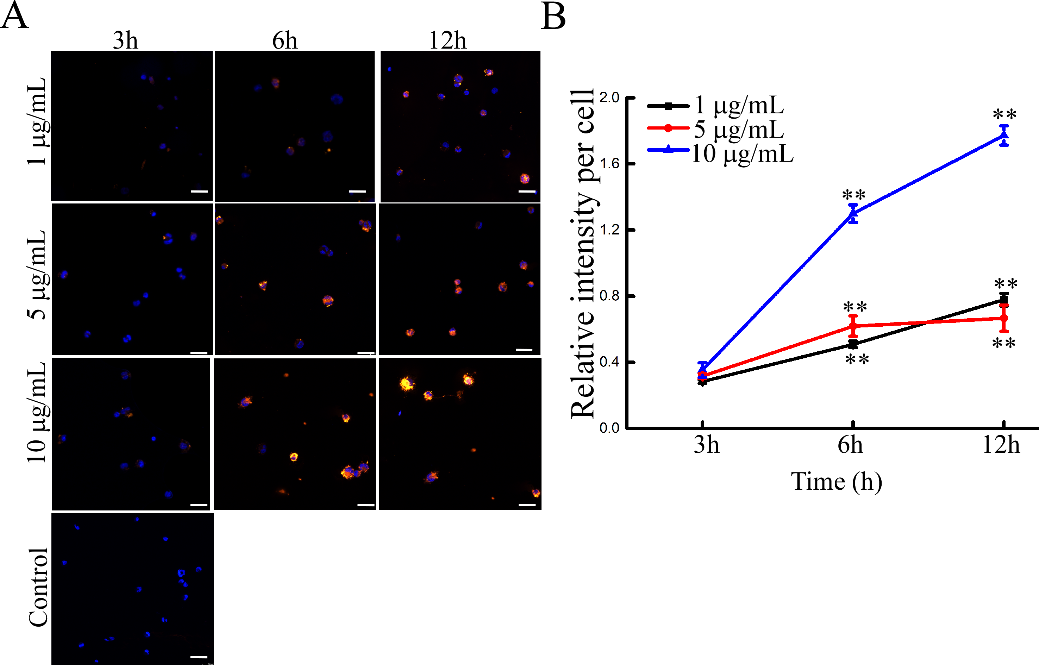


**Figure S1. Cellular uptake of TcNVs and viability of melanoma cells.**

(A) Representative fluorescence microscope images of cellular uptake of DiI-labeled LNVs (red) at 1, 5 and 10 μg/mL. Magnification: 200X. Scale bar=50 μm. (B) Quantification of the uptake of LNVs up to 12 h. ** indicate difference for p < 0.01 in comparison to the cells treated with cell culture media as control. (n = 3).

**
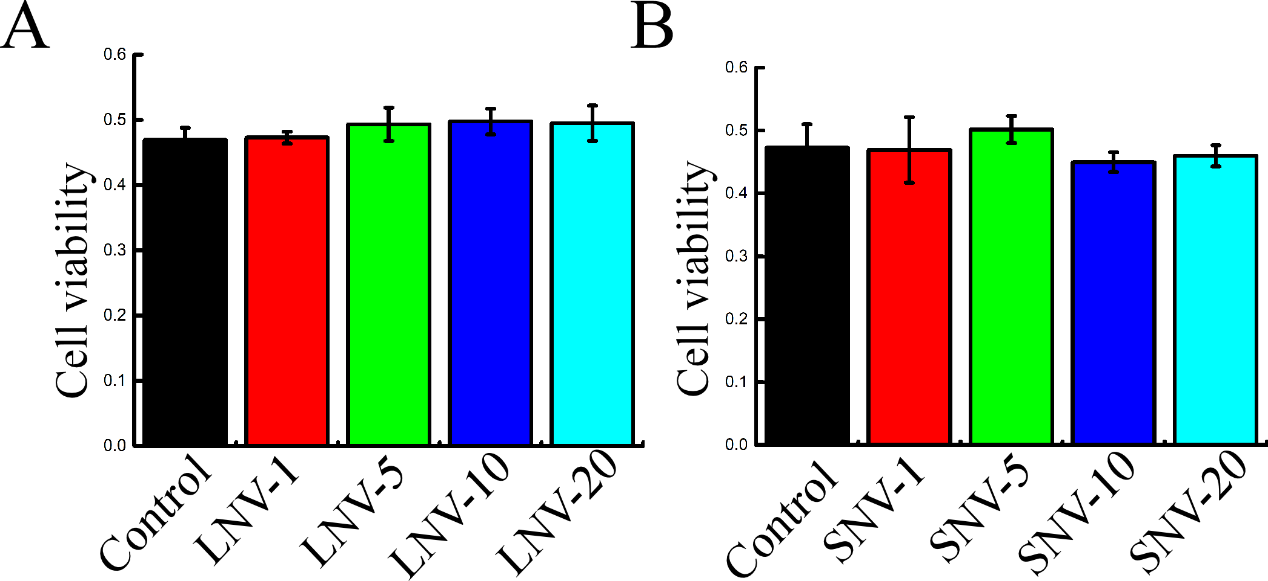
**

**Figure S2. The effects of TcNVs on the cell vitality of THP-1 macrophages.**

(A)-(B). The dose experiments of LNVs (A) and SNVs (B) affect the cell vitality of THP-1 macrophages. Different amounts of TcNVs (1 µg/5 µg /10 µg /20 µg/mL, represented by SNV/LNV-1/5/10/20) were added to the THP-1 macrophages for 48 h. The cell vitality was tested by Cell Counting Kit-8. Data were expressed as the mean ± SD.


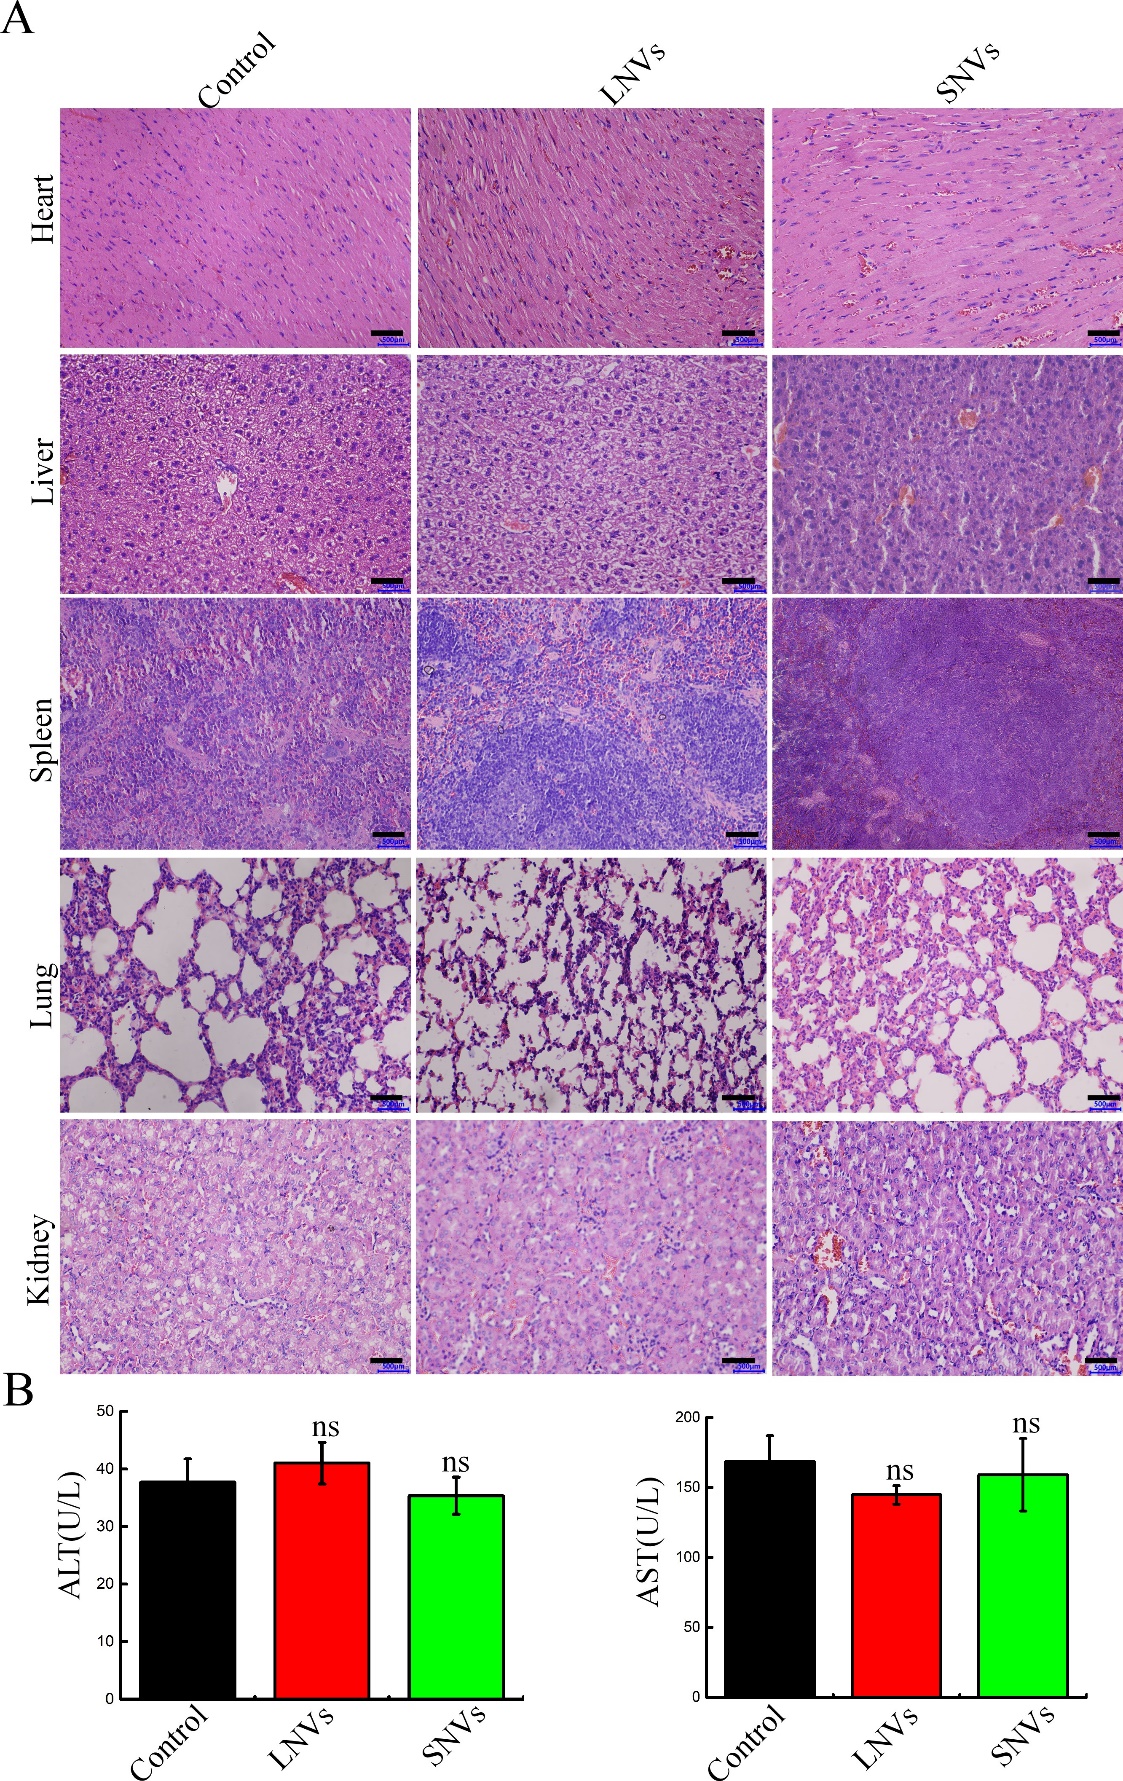


**Figure S3. Biosafety of TcNVs in mice.**

(A) H&E staining of major organs. Scale bar=500 µm. Magnification: 400X. (B) ALT and AST levels in the serum of mice. Error bar represents SD (n = 3; nsP >0.05, indicating no significantly different from control group).


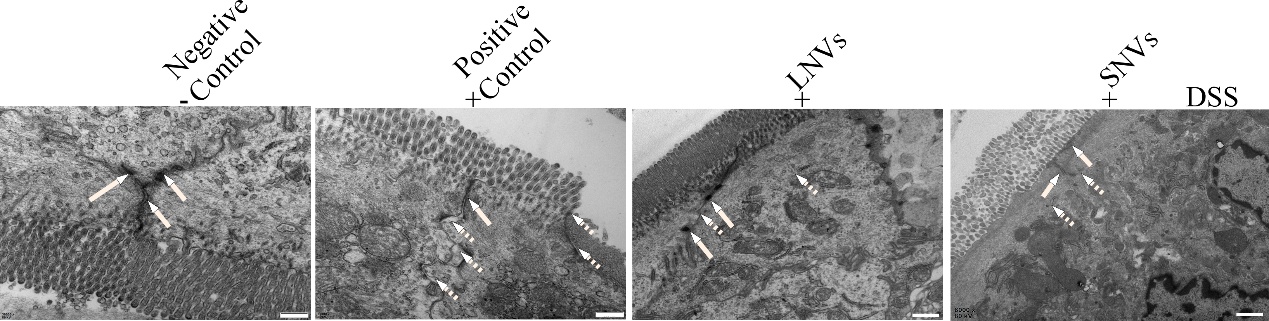


**Figure S4. TcNVs treatment reversed gut barrier structural changes of colitis tissues.**

The [distribution](javascript:;)of tight junction in the different experimental groups examined by transmission electron microscopy. The solid lines pointed to intact tight junction and dotted lines to damaged tight junction. Magnification: 30000X. Scale bar = 500 nm.


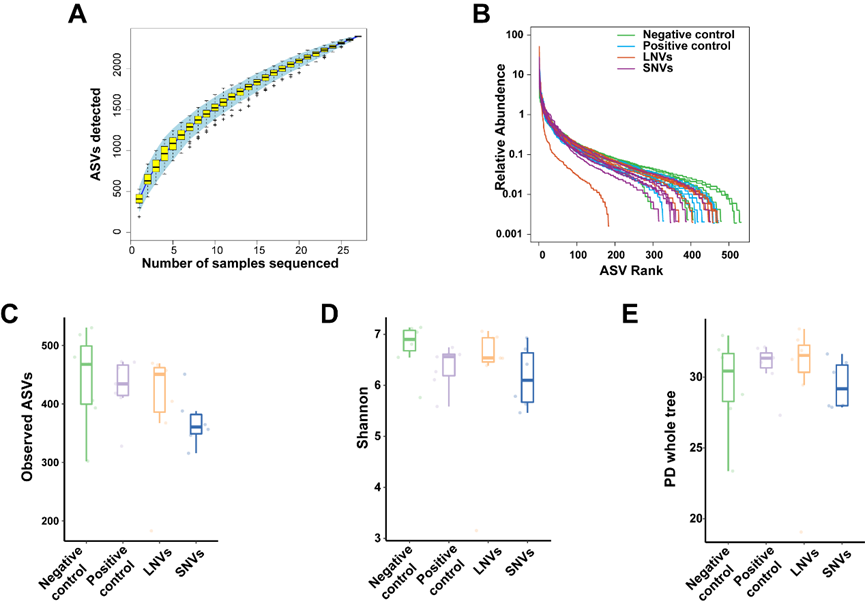


**Figure S5. Change of bacterial alpha diversity of gut microbiota in DSS-induced UC mice model under TcNVs interventions.**

(A) Species accumulation curves. With the increase of the number of samples, the microbial ASVs curve detected in the gut flora reached saturation, indicating that the gut flora we studied captured most of the gut microbial members. (B) ASVs rank analysis among four groups. (C)-(E) Comparison on bacterial alpha diversity by Observed ASVs (C), Shannon index (D), and PD whole tree (E) between groups (n = 6-7). Rank abundance and alpha diversity index analysis found that LNVs not SNVs was trend to improve microbial diversity of gut in DSS-induced UC mice, although there was no significant difference among these groups showing by Observed ASVs, Shannon index, and PD whole tree index. T-test (pairwise comparisons with pooled SD) was used for (C-D).


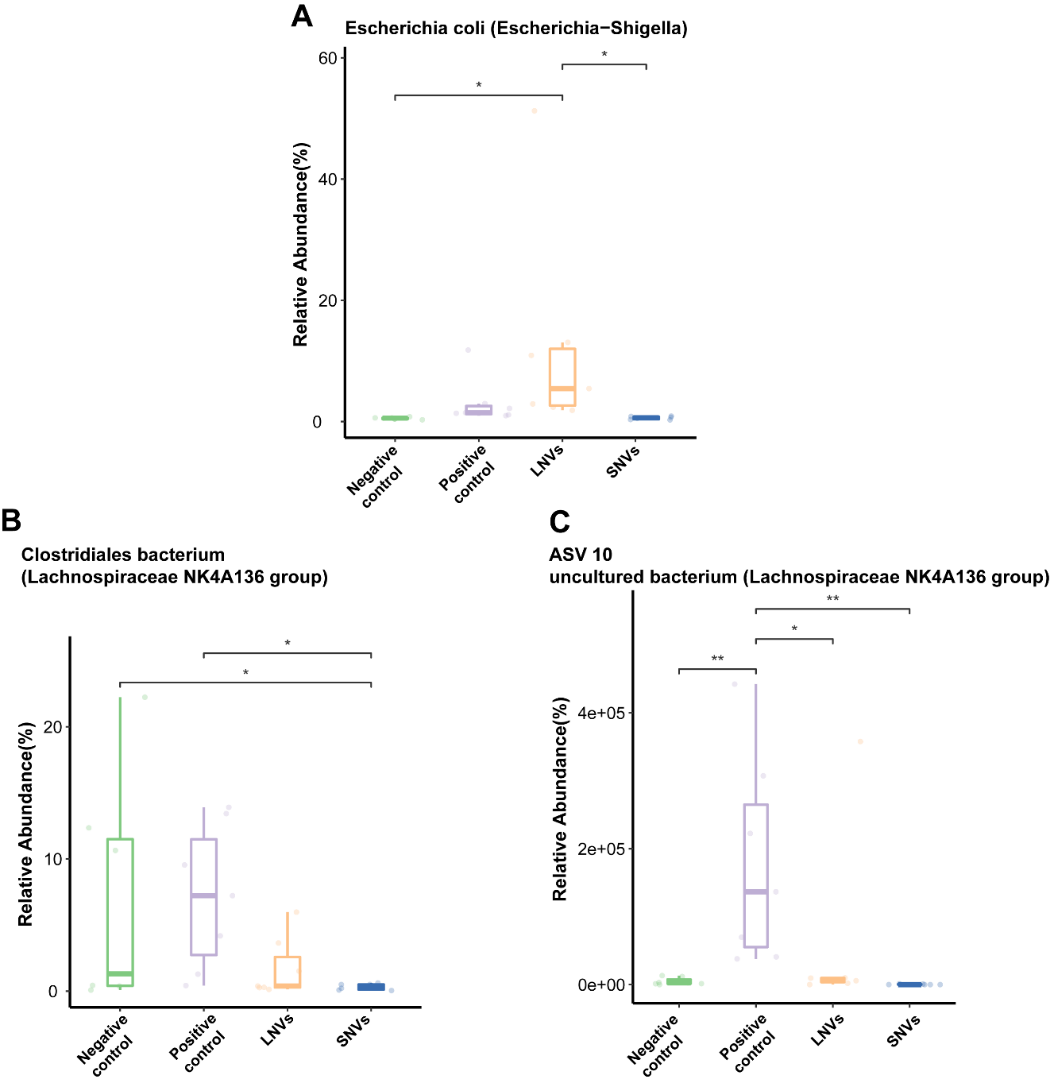


**Figure S6. Significantly changed bacterial taxa in DSS-induced UC mice model under TcNVs interventions.**

(A) Relative abundance of *Escherichia coli* among different TcNVs treatments. (B) Species *Clostridiales bacterium*. (C) *uncultured bacterium* (ASV10). Data were expressed as boxplot. A Kruskal Wallis statistical test was used. *p < 0.05, **p < 0.01.

**Table S1. Primers used for RT-qPCR assays.**

| Primer name | Sequence from 5’ site to 3’ site |
| --- | --- |
| LP-IL-6 | AGCCACTCACCTCTTCAGAAC |
| RP-IL-6 | GCCTCTTTGCTGCTTTCACAC |
| LP-IL-8 | CTGATTTCTGCAGCTCTGTGT |
| RP-IL-8 | GGGTGGAAAGGTTTGGAGTATG |
| LP-IL-1β | GTGGCAATGAGGATGACTTGTTC |
| RP-IL-1β | TAGTGGTGGTCGGAGATTCGTA |
| LP-TNF-α | CTGCTGCACTTTGGAGTGAT |
| RP-TNF-α | AGATGATCTGACTGCCTGGG |
| LP-GAPDH | AAGGTCATCCATGACAACTTTGGC |
| LP-GAPDH | ACAGTCTTCTGGGTGGCAGTGAT |

**Table S2. Lipids found in TcNVs.**

| Class | all_sample | LNVs | SNVs |
| --- | --- | --- | --- |
| Cholesteryl ester | 1 | 0 | 1 |
| Ceramide | 14 | 3 | 14 |
| Phytoceramide | 16 | 6 | 16 |
| Coenzyme Q | 2 | 2 | 2 |
| Diacylglycerol | 31 | 20 | 31 |
| Digalactosyldiacylglycerol | 16 | 4 | 16 |
| Diacylglyceryl trimethylhomoserine | 12 | 3 | 11 |
| Free fatty acid | 13 | 11 | 13 |
| Hexosylceramide | 12 | 5 | 12 |
| Lysodiacylglyceryl trimethylhomoserine | 4 | 4 | 3 |
| Lysophosphatidic acid | 7 | 6 | 7 |
| Lysophophatidylcholine | 20 | 11 | 20 |
| Lysophosphatidylethanolamine | 9 | 8 | 9 |
| Lysophosphatidylglycerol | 3 | 3 | 3 |
| Lysophosphatidylinositol | 3 | 1 | 3 |
| Monoacylglycerol | 3 | 3 | 3 |
| Monogalactosyldiacylglycerol | 18 | 1 | 18 |
| Phosphatidic acid | 12 | 6 | 12 |
| Phosphatidylcholine | 23 | 12 | 23 |
| Phosphatidylethanolamine | 31 | 17 | 31 |
| Phosphatidylglycerol | 24 | 11 | 24 |
| Phosphatidylinositol | 11 | 6 | 11 |
| Phosphatidylmethanol | 4 | 2 | 4 |
| Phosphatidylserine | 1 | 1 | 1 |
| sphingosine | 5 | 3 | 5 |
| Sulfoquinovosyl diacylglycerol | 8 | 2 | 8 |
| Triacylglycerol | 218 | 142 | 218 |

**Table S3: Proteomics analysis of TcNVs.**

| Accession Number | Protein description |
| --- | --- |
| A0A090ARE9 | Tubulin alpha chain |
| A0A1C9M356 | Photosystem II reaction center protein H |
| A0A2A2PGB2 | Efflux transporter periplasmic adaptor subunit |
| A0A2A2PN35 | Indole-3-glycerol phosphate synthase |
| A0A2A2PP79 | Murein transglycosylase |
| A0A2A2PQP1 | Outer membrane lipoprotein I |
| A0A2A2PQP6 | Imelysin |
| A0AA38BPN3 | Uncharacterized protein |
| A0AA38BQJ4 | fructose-bisphosphate aldolase |
| A0AA38BTU3 | Uncharacterized protein |
| A0AA38BWW7 | EGF-like domain-containing protein |
| A0AA38BYA7 | RING-type E3 ubiquitin transferase |
| A0AA38C0C7 | Peptidase A1 domain-containing protein |
| A0AA38C1H4 | Glucose-methanol-choline oxidoreductase |
| A0AA38C249 | Chlorophyllase |
| A0AA38C2I6 | Uncharacterized protein |
| A0AA38C4H0 | Peptidase M20 dimerisation |
| A0AA38C4W2 | Uncharacterized protein |
| A0AA38C7Q9 | Uncharacterized protein |
| A0AA38CA52 | Uncharacterized protein |
| A0AA38CB99 | Glycoside hydrolase family |
| A0AA38CD39 | Uncharacterized protein |
| A0AA38CD79 | Inhibitor I9 domain-containing protein |
| A0AA38CED5 | Glucan endo-1,3-beta-D-glucosidase |
| A0AA38CFC5 | Peroxidase |
| A0AA38CFJ5 | FHA domain |
| A0AA38CHK3 | Tobamovirus multiplication protein |
| A0AA38CHM3 | Glycerol-3-phosphate dehydrogenase |
| A0AA38CLL5 | Glycoside hydrolase family |
| A0AA38CMC2 | Gnk2-homologous domain |
| A0AA38CN74 | 14-3-3 domain |
| A0AA38CNH9 | Uncharacterized protein |
| A0AA38CRF1 | Uncharacterized protein |
| A0AA38CWX5 | Protein YIP |
| A0AA38EZ94 | Nucleoside phosphorylase domain |
| A0AA38F2Y4 | Bicarbonate transporter-like transmembrane domain |
| A0AA38F4W7 | Peptidase M28 domain |
| A0AA38F5T3 | oxygen evolving system of photosystem II |
| A0AA38F726 | Cytochrome b5 heme-binding domain |
| A0AA38F754 | Phosphoglycerate kinase |
| A0AA38F7S0 | Histone H2A/H2B/H3 domain |
| A0AA38F9M6 | Uncharacterized protein |
| A0AA38FAF7 | Ubiquitin-like domain |
| A0AA38FAK5 | MIF4G domain-containing protein |
| A0AA38FDS5 | MAR-binding filament-like protein 1-1 |
| A0AA38FEL1 | Uncharacterized protein |
| A0AA38FF05 | Phytocyanin domain |
| A0AA38FGQ5 | Plasma membrane intrinsic protein |
| A0AA38FGU7 | Elongation factor Ts |
| A0AA38FJ85 | H(+)-exporting diphosphatase |
| A0AA38FJC0 | Uncharacterized protein |
| A0AA38FJE1 | Maternal effect embryo arrest 22 |
| A0AA38FJI4 | Uncharacterized protein |
| A0AA38FMR6 | glycerophosphodiester phosphodiesterase |
| A0AA38FPI9 | Low-temperature-induced 65 kDa protein |
| A0AA38FQ79 | Peroxidase |
| A0AA38FS81 | Uncharacterized protein |
| A0AA38FSX3 | Acyl carrier protein |
| A0AA38FTC2 | Uncharacterized protein |
| A0AA38FTV4 | Chlorophyll synthase |
| A0AA38FUA8 | Acyl carrier protein |
| A0AA38FVY2 | Elongation factor 1-alpha |
| A0AA38G0X8 | CCHC-type domain |
| A0AA38G2E9 | Plant heme peroxidase family profile domain |
| A0AA38G4A7 | Uncharacterized protein |
| A0AA38G4K9 | Actin |
| A0AA38G4L5 | Non-specific lipid-transfer protein |
| A0AA38G752 | Saposin B-type domain |
| A0AA38G7M2 | Ubiquitin-like domain |
| A0AA38G835 | Homologous-pairing protein 2 homolog |
| A0AA38G851 | CBM20 domain |
| A0AA38GAD1 | Glucan endo-1,3-beta-D-glucosidase |
| A0AA38GAE1 | Lon proteolytic domain |
| A0AA38GAN4 | Bifunctional inhibitor/plant lipid transfer protein |
| A0AA38GB52 | Dehydrin 2 |
| A0AA38GBC1 | Peptidase C14 caspase domain |
| A0AA38GBP3 | Dehydrin 9 |
| A0AA38GCM3 | EF-hand domain-containing protein |
| A0AA38GE44 | ADP/ATP translocase |
| A0AA38GED4 | Uncharacterized protein |
| A0AA38GGB3 | FAS1 domain-containing protein |
| A0AA38GGP2 | Uncharacterized protein |
| A0AA38GLR0 | Centromere protein F |
| A0AA38GN40 | Uncharacterized protein |
| A0AA38GTU9 | Uncharacterized protein |
| A0AA38GUR7 | superoxide dismutase |
| A0AA38GWC4 | Uncharacterized protein |
| A0AA38GXE4 | FAS1 domain-containing protein |
| A0AA38GXQ8 | RRM domain-containing protein |
| A0AA38L734 | Plant heme peroxidase family profile domain |
| A0AA38L8X1 | Acyl carrier protein |
| A0AA38L9C7 | Ribulose bisphosphate carboxylase/oxygenase activase |
| A0AA38LGX4 | Dehydrin 2 |
| A0AA38LHQ1 | Cadherin-like beta sandwich domain |
| A0AA38LK36 | Phytocyanin domain-containing protein |
| A0AA38LMM1 | Uncharacterized protein |
| A0AA38LPG2 | Uncharacterized protein |
| P85355 | Endochitinase 3 |
